# Supplementary material
Source: PubMed Central journal article supplement (PMC7881940)
Supplement: NIHMS1662424-supplement-Supplementary_Tables.pdf [file NIHMS1662424-supplement-Supplementary_Tables.pdf]

**Supplementary Table 1. Patient characteristics, adverse events and best response (patients with HR+ BC from trials NCT03595540 and NCT03340935).**

| Pt. no | Age | BMI at enrollment (kg/m <sup>2</sup> ) | Stage and HER2 status | type of ET and other therapies     | Adjuvant (A) vs. palliative (P) therapy | Site of metastasis            | No of FMD cycles | Reduced/non-administered FMD cycles                  | Adverse events                                | Best response |
|--------|-----|----------------------------------------|-----------------------|------------------------------------|-----------------------------------------|-------------------------------|------------------|------------------------------------------------------|-----------------------------------------------|---------------|
| 1      | 51  | 34.4                                   | IV; HER2-neg          | FULV+PALB                          | P                                       | lymph nodes                   | 10*              | 1 reduced cycle (4d)                                 | none                                          | SD            |
| 2      | 46  | 34.8                                   | IV; HER2-pos          | exemestane+rastuzumab; pertuzumab  | P                                       | liver, lung, lymph nodes      | 6                | none                                                 | diarrhea (G2)                                 | SD            |
| 3      | 62  | 25.3                                   | IV; HER2-neg          | letrozole                          | P                                       | pleura                        | 13               | 4 reduced cycles (3-4d) and 1 non-administered cycle | none                                          | SD            |
| 4      | 55  | 26.4                                   | IIB; HER2-neg         | exemestane                         | A                                       | N/A                           | 4*               | 2 reduced cycles (3-4d)                              | diarrhea (G2)                                 | NED           |
| 5      | 37  | 22.1                                   | IA; HER2-neg          | exemestane+GnRH agonist            | A                                       | N/A                           | 9                | 1 reduced cycle (4d)                                 | none                                          | NED           |
| 6      | 54  | 32.3                                   | IIB; HER2-neg         | letrozole                          | A                                       | N/A                           | 14               | none                                                 | headache (G1); fatigue (G2) hypotension (G2)  | NED           |
| 7      | 52  | 19.6                                   | IV; HER2-neg          | exemestane                         | P                                       | bone                          | 12               | 1 reduced cycle (4d)                                 | headache (G1)                                 | SD            |
| 8      | 48  | 22.2                                   | IIB; HER2-neg         | exemestane+GnRH agonist            | A                                       | N/A                           | 12               | none                                                 | headache (G1); tinnitus (G1)                  | NED           |
| 9      | 54  | 25.2                                   | IIA; HER2-neg         | exemestane                         | A                                       | N/A                           | 3                | none                                                 | headache (G1)                                 | NED           |
| 10     | 54  | 22.4                                   | IA; HER2-neg          | letrozole                          | A                                       | N/A                           | 5                | none                                                 | headache (G1)                                 | NED           |
| 11     | 46  | 22.3                                   | IA; HER2-neg          | letrozole+GnRH agonist             | A                                       | N/A                           | 11               | 4 reduced cycles (4d)                                | fatigue (G2); headache(G1)                    | NED           |
| 12     | 49  | 23                                     | IIB; HER2-pos         | exemestane+rastuzumab+GnRH agonist | A                                       | N/A                           | 5                | none                                                 | none                                          | NED           |
| 13     | 42  | 26.2                                   | IA; HER2-neg          | exemestane+GnRH agonist            | A                                       | N/A                           | 5                | none                                                 | none                                          | NED           |
| 14     | 56  | 22.9                                   | IIB                   | exemestane                         | A                                       | N/A                           | 7                | none                                                 | abdominal pain (G1)                           | NED           |
| 15     | 43  | 33.4                                   | IV                    | FULV+abemaciclib                   | P                                       | skin, lung, bone, lymph nodes | 1*               | none                                                 | none                                          | SD            |
| 16     | 42  | 21.9                                   | IIB                   | exemestane+GnRH agonist            | A                                       | N/A                           | 5                | 1 reduced cycle (3d)                                 | none                                          | NED           |
| 17     | 45  | 30.4                                   | IIB                   | TMX+ GnRH agonist                  | A                                       | N/A                           | 6                | none                                                 | fatigue (G1); hypotension (G2); headache (G1) | NED           |
| 18     | 57  | 25                                     | IV                    | letrozole                          | A                                       | N/A                           | 4*               | none                                                 | none                                          | SD            |
| 19     | 44  | 30.4                                   | IIA                   | TMX+ GnRH agonist                  | A                                       | N/A                           | 6                | none                                                 | fatigue (G1); headache (G1)                   | NED           |

|    |    |       |      |                          |   |                                |   |                                                |                                                                         |     |
|----|----|-------|------|--------------------------|---|--------------------------------|---|------------------------------------------------|-------------------------------------------------------------------------|-----|
| 20 | 50 | 25.4  | IA   | TMX+ GnRH agonist        | A | N/A                            | 3 | 1 reduced cycle (3d); 1 cycle not administered | none                                                                    | NED |
| 21 | 58 | 21.3  | IB   | letrozole                | A | N/A                            | 9 | 1 reduced cycle (4d)                           | fatigue (G1)                                                            | NED |
| 22 | 48 | 42.1  | IIB  | exemestane+ GnRH agonist | A | N/A                            | 7 | none                                           | none                                                                    | NED |
| 23 | 62 | 27.6  | IIIC | exemestane               | A | N/A                            | 4 | none                                           | headache (G1)                                                           | NED |
| 24 | 50 | 24.5  | IB   | exemestane+ GnRH agonist | A | N/A                            | 1 | none                                           | headache (G1), fatigue (G1)                                             | NED |
| 25 | 67 | 21.1  | IV   | exemestane+ everolimus   | P | bone                           | 2 | N/A                                            | fatigue (G2)                                                            | PR  |
| 26 | 52 | 26.44 | IV   | FULV+PALB                | P | bone                           | 8 | N/A                                            | fatigue (G2), headache (G1)                                             | CR  |
| 27 | 50 | 21.77 | IV   | FULV+PALB+ GnRH agonist  | P | bone, liver                    | 8 | N/A                                            | fatigue (G2), headache (G1), vomiting (G1)                              | CR  |
| 28 | 53 | 23.84 | IV   | FULV                     | P | bone, liver, lymph nodes       | 4 | N/A                                            | fatigue (G3), vomiting (G2), rash (G1)                                  | SD  |
| 29 | 52 | 23.98 | IV   | FULV+PALB                | P | lung, liver, bone, lymph nodes | 5 | N/A                                            | fatigue (G1), nausea (G1), vomiting (G1), tachycardia (G1)              | SD  |
| 30 | 50 | 23.16 | IV   | TMX                      | P | lung, bone, lymph nodes        | 5 | N/A                                            | Fatigue (G1), headache (G1)                                             | SD  |
| 31 | 43 | 21.72 | IV   | FULV+ GnRH agonist       | P | bone                           | 2 | N/A                                            | fatigue (G1), nausea (G1), dizziness (G1), vomiting (G1), headache (G1) | PD  |
| 32 | 44 | 29.4  | IA   | TMX+ GnRH agonist        | A | N/A                            | 8 | N/A                                            | fatigue (G2), nausea (G1), headache (G1), vomiting (G1)                 | NED |
| 33 | 61 | 33.12 | IIB  | letrozole                | A | N/A                            | 5 | N/A                                            | fatigue (G2)                                                            | NED |
| 34 | 50 | 26.9  | IIB  | TMX                      | A | N/A                            | 8 | N/A                                            | fatigue (G2), constipation (G1), hot flushes (G1)                       | NED |
| 35 | 73 | 20.82 | IA   | letrozole                | A | N/A                            | 7 | N/A                                            | nausea (G1), fatigue (G1), headache (G1)                                | N/A |
| 36 | 55 | 21.13 | IIA  | letrozole                | A | N/A                            | 4 | N/A                                            | fatigue (G1), headache (G1), dizziness (G1), muscle cramps (G1)         | N/A |

Abbreviations: CR: complete response; PR: partial response; SD: stable disease; NED no evidence of disease; PD: progression of disease.

Pts. 1-24 are from trial NCT03595540; Pts. 25-36 are from trial NCT03340935.

\*The patient dropped out for personal reasons.

**Supplementary Table 2. Complete blood counts and metabolic panel post-FMD (within 48h from the end of a FMD cycle) in patients with HR+ BC treated with ET and periodic FMD (trial NCT03595540).**

| Blood test                                        | Pt.#3 | Pt.#5 | Pt.#6 | Pt.#7 | Pt.#14 | Pt.#24 |
|---------------------------------------------------|-------|-------|-------|-------|--------|--------|
| hemoglobin (g/dl; 12-16)                          | 13.4  | 13.4  | 13.8  | 13.9  | 14.3   | 14.0   |
| hematocrit (%; 35-47)                             | 41.6  | 38.0  | 42.2  | 40.7  | 43.5   | 41.0   |
| mean corpuscular volume (fl; 79-98)               | 90.3  | 83.7  | 91.2  | 88.0  | 89.8   | 91.9   |
| white blood cells ( $10^3/\mu\text{l}$ ; 4.5-9.8) | 5.15  | 3.87  | 3.94  | 2.7   | 4.2    | 4.80   |
| neutrophils ( $10^3/\mu\text{l}$ ; 1.8-7.8)       | 2.24  | 2.32  | 1.78  | 1.2   | 2.3    | 2.1    |
| lymphocytes ( $10^3/\mu\text{l}$ ; 1.1-4.8)       | 2.52  | 1.21  | 1.63  | 1.2   | 1.3    | 1.9    |
| platelets ( $10^3/\mu\text{l}$ ; 130-430)         | 214   | 180   | 267   | 163   | 208    | 347    |
| creatinine (mg/dl; 0.51-0.95)                     | 0.67  | 0.8   | 0.74  | 0.75  | 0.8    | 0.8    |
| blood urea nitrogen (mg/dl; 21-54)                | n.a.  | n.a.  | 33    | 38    | 22     | 29     |
| sodium (mmol/l; 135-150)                          | 139   | 143   | 141   | 139   | 140    | 141    |
| potassium (mmol/l; 3.5-5.0)                       | 4.5   | 4.4   | n.a.  | 4.6   | 3.8    | 4.4    |
| phosphorus (mg/dl; 2.5-4.5)                       | 3.7   | 4.3   | n.a.  | 4.0   | 2.6    | 3.9    |
| magnesium (mg/dl; 1.9-2.5)                        | 2.0   | 2.0   | 2.2   | 2.14  | 2.1    | 2.1    |
| albumin (g/l; 34-50)                              | 45    | 52.5  | 47.3  | n.a.  | 47.6   | 45.9   |

Abbreviations: n.a.: not available.

Supplementary Table 3. QPCR primer list

| Gene name          | FW/REV primer | primer sequence          |
|--------------------|---------------|--------------------------|
| <b>Human ACTB</b>  | FW            | CGGGAAATCGTGCCTGACATTAAG |
|                    | REV           | TGATCTCCTTCTGCATCCTGTCGG |
| <b>Human TFF1</b>  | FW            | TTTGGAGCAGAGAGGAGGCAATG  |
|                    | REV           | ACCACAATTCTGTCTTTCACGGGG |
| <b>Human E2F1</b>  | FW            | ATGTTTTCCCTGTGCCCTGAG    |
|                    | REV           | ATCTGTGGTGAGGGATGAGG     |
| <b>Human E2F2</b>  | FW            | CTCTCTGAGCTTCAAGCACCTG   |
|                    | REV           | CTTGACGGCAATCACTGTCTGC   |
| <b>Human CCNE1</b> | FW            | TGTGTCCTGGATGTTGACTGCC   |
|                    | REV           | CTCTATGTGCGCACCCTGATACC  |
| <b>Human CCND1</b> | FW            | GCCTCTAAGATGAAGGAGAC     |
|                    | REV           | CCATTTGCAGCAGCTC         |
| <b>Human EGR1</b>  | FW            | GCAGAGTCTTTTCCTGAC       |
|                    | REV           | TTGGTCATGCTCACTAGG       |
| <b>Human PTEN</b>  | FW            | GGCTAAGTGAAGATGACAA      |
|                    | REV           | GTTACTCCCTTTTTGTCTCT     |
| <b>Human TFF1</b>  | FW            | TTTGGAGCAGAGAGGAGGCAATG  |
|                    | REV           | ACCACAATTCTGTCTTTCACGGGG |
| <b>Human GREB</b>  | FW            | CTTGGTTTCTCTGGGAATTG     |
|                    | REV           | TTCCAACAGATTAAGGTCC      |
| <b>mouse Actb</b>  | FW            | GATGTATGAAGGCTTTGGTC     |
|                    | REV           | TGTGCACTTTTATTGGTCTC     |
| <b>mouse Egr1</b>  | FW            | CAGAGTCCTTTTCTGACATC     |
|                    | REV           | GAGAAGCGGCCAGTATAG       |
| <b>mouse Pten</b>  | FW            | AACTTGCAATCCTCAGTTTG     |
|                    | REV           | CTACTTTGATATCACCACACAC   |
| <b>mouse Tff1</b>  | FW            | CTCAAGAAGAAGAATGTCCC     |
|                    | REV           | CTCTTTTAATTCTCAGGCCG     |
